# Supplementary material for: Subjects’ Perception in Quantifying Printed and Digital Photos of Food Portions
Source: MDPI journal article supplement (doi:10.3390/nu11030501), 2019-02-27
Supplement: s1 [file s1]

**Table 1.** Description of food portions of the original photo and of the evaluated portion, according to size and format.

| Foods              | Food description       | Amount of food (g) in the original photo |         |       | Amount of food (g) presented |                  |                  | Portion with different format than the original photo |
|--------------------|------------------------|------------------------------------------|---------|-------|------------------------------|------------------|------------------|-------------------------------------------------------|
|                    |                        | Small                                    | Average | Large | Small                        | Average          | Large            |                                                       |
| <b>Apple</b>       | <b>Whole unit</b>      | 66                                       | 198     | 217   | 66                           | 178 <sup>a</sup> | 217 <sup>b</sup> | Different Apple                                       |
| Beans              | With liquid            | 61                                       | 174     | 354   | 61                           | 160 <sup>a</sup> | 354              | -                                                     |
| Cabbage            | Chopped, raw           | 17                                       | 57      | 123   | 17                           | 51 <sup>a</sup>  | 123              | -                                                     |
| Carrot             | Grated                 | 25                                       | 85      | 160   | 37 <sup>a</sup>              | 85               | 160              | -                                                     |
| Cassava            | Pieces, cooked         | 118                                      | 238     | 415   | 118                          | 193 <sup>a</sup> | 415              | -                                                     |
| Egg                | Scrambled              | 69                                       | 123     | 190   | 69 <sup>b</sup>              | 123              | 288 <sup>a</sup> | Position on the plate                                 |
| <i>Feijoada</i>    | In deep plate          | 172                                      | 376     | 478   | 236 <sup>a</sup>             | 376 <sup>c</sup> | 478 <sup>c</sup> | Different plate                                       |
| Jello              | Amorphous format       | 116                                      | 298     | 480   | 116 <sup>b</sup>             | 298              | 434 <sup>a</sup> | Position on the plate                                 |
| Green salad leaves | Mixed green salad      | 5                                        | 17      | 100   | 2.5 <sup>a</sup>             | 17               | 100              | -                                                     |
| Ground beef        | With tomato sauce      | 120                                      | 251     | 402   | 120 <sup>b</sup>             | 288 <sup>a</sup> | 402              | Position on the plate                                 |
| Kale               | Chopped, sautéed       | 34                                       | 62      | 90    | 34                           | 62               | 135 <sup>a</sup> | -                                                     |
| Margarine          | Spread on sliced bread | 2.5                                      | 15      | 22    | 2.5                          | 15               | 30 <sup>a</sup>  | -                                                     |
| Mortadella         | Sliced                 | 17                                       | 19      | 27    | 17 <sup>b</sup>              | 18 <sup>a</sup>  | 27               | Slice thickness                                       |
| Papaya             | Slices                 | 139                                      | 390     | 614   | 139                          | 438 <sup>a</sup> | 614              | -                                                     |
| Pasta              | Cooked spaghetti       | 61                                       | 170     | 400   | 35 <sup>a</sup>              | 170              | 400              | -                                                     |
| Popcorn            | Glass bowl             | 23                                       | 41      | 77    | 17 <sup>a</sup>              | 41 <sup>b</sup>  | 77               | Different Bowl                                        |
| Potato             | Boiled, diced          | 70                                       | 228     | 405   | 35 <sup>a</sup>              | 228 <sup>b</sup> | 405              | Position on the plate                                 |
| Rice               | White cooked           | 112                                      | 239     | 403   | 141 <sup>a</sup>             | 239              | 403 <sup>b</sup> | Position on the plate                                 |
| Vegetable soup     | In deep plate          | 96                                       | 324     | 400   | 96                           | 362 <sup>a</sup> | 400 <sup>b</sup> | Different plate                                       |

a The evaluated portion ranged from up to 100% smaller to 50% larger than the original portion, depending on the amount of the adjacent photo, b Portion assessed on different format than the one from the original photo, c Half of the evaluated portions had the same size as the photo and the other half had a different format
